# Supplementary material for: Fluorescence upconversion by triplet–triplet annihilation in all-organic poly(methacrylate)-terpolymers
Source: Royal Society of Chemistry journal article supplement (doi:10.1039/d0cp00232a), 2020-01-01

## checkCIF/PLATON report

Structure factors have been supplied for datablock(s) FO6304, FO6401

THIS REPORT IS FOR GUIDANCE ONLY. IF USED AS PART OF A REVIEW PROCEDURE FOR PUBLICATION, IT SHOULD NOT REPLACE THE EXPERTISE OF AN EXPERIENCED CRYSTALLOGRAPHIC REFEREE.

No syntax errors found.      CIF dictionary      Interpreting this report

### Datablock: FO6304

---

|                 |                   |                    |              |
|-----------------|-------------------|--------------------|--------------|
| Bond precision: | C-C = 0.0031 A    | Wavelength=0.71073 |              |
| Cell:           | a=14.4922(3)      | b=14.2458(2)       | c=15.9319(3) |
|                 | alpha=90          | beta=91.960(1)     | gamma=90     |
| Temperature:    | 133 K             |                    |              |
|                 | Calculated        | Reported           |              |
| Volume          | 3287.26(10)       | 3287.26(10)        |              |
| Space group     | P 21/n            | P 21/n             |              |
| Hall group      | -P 2yn            | -P 2yn             |              |
| Moiety formula  | C19 H19 B F2 N2 O | C19 H19 B F2 N2 O  |              |
| Sum formula     | C19 H19 B F2 N2 O | C19 H19 B F2 N2 O  |              |
| Mr              | 340.17            | 340.17             |              |
| Dx,g cm-3       | 1.375             | 1.375              |              |
| Z               | 8                 | 8                  |              |
| Mu (mm-1)       | 0.100             | 0.100              |              |
| F000            | 1424.0            | 1424.0             |              |
| F000'           | 1424.73           |                    |              |
| h,k,lmax        | 18,18,20          | 18,18,20           |              |
| Nref            | 7537              | 7523               |              |
| Tmin,Tmax       | 0.988,0.991       | 0.703,0.746        |              |
| Tmin'           | 0.988             |                    |              |

Correction method= # Reported T Limits: Tmin=0.703 Tmax=0.746  
AbsCorr = MULTI-SCAN

Data completeness= 0.998      Theta(max)= 27.480

R(reflections)= 0.0600( 5331)      wR2(reflections)= 0.1222( 7523)

S = 1.094      Npar= 467

---

The following ALERTS were generated. Each ALERT has the format

**test-name\_ALERT\_alert-type\_alert-level.**

Click on the hyperlinks for more details of the test.

---

● **Alert level C**

PLAT906\_ALERT\_3\_C Large K Value in the Analysis of Variance ..... 11.775 Check  
PLAT906\_ALERT\_3\_C Large K Value in the Analysis of Variance ..... 2.334 Check  
PLAT911\_ALERT\_3\_C Missing FCF Refl Between Thmin & STh/L= 0.600 3 Report

---

● **Alert level G**

PLAT005\_ALERT\_5\_G No Embedded Refinement Details Found in the CIF Please Do !  
PLAT720\_ALERT\_4\_G Number of Unusual/Non-Standard Labels ..... 6 Note  
PLAT899\_ALERT\_4\_G SHELXL97 is Deprecated and Succeeded by SHELXL 2018 Note  
PLAT910\_ALERT\_3\_G Missing # of FCF Reflection(s) Below Theta(Min). 3 Note  
PLAT912\_ALERT\_4\_G Missing # of FCF Reflections Above STh/L= 0.600 9 Note  
PLAT978\_ALERT\_2\_G Number C-C Bonds with Positive Residual Density. 7 Info

---

- 0 **ALERT level A** = Most likely a serious problem - resolve or explain  
0 **ALERT level B** = A potentially serious problem, consider carefully  
3 **ALERT level C** = Check. Ensure it is not caused by an omission or oversight  
6 **ALERT level G** = General information/check it is not something unexpected
- 0 ALERT type 1 CIF construction/syntax error, inconsistent or missing data  
1 ALERT type 2 Indicator that the structure model may be wrong or deficient  
4 ALERT type 3 Indicator that the structure quality may be low  
3 ALERT type 4 Improvement, methodology, query or suggestion  
1 ALERT type 5 Informative message, check
- 

## Datablock: FO6401

---

Bond precision: C-C = 0.0089 A

Wavelength=0.71073

Cell: a=21.8579(4) b=10.5698(2) c=18.2672(4)  
alpha=90 beta=112.645(1) gamma=90  
Temperature: 133 K

|                        | Calculated           | Reported             |
|------------------------|----------------------|----------------------|
| Volume                 | 3894.98(14)          | 3894.98(13)          |
| Space group            | P 21/c               | P 21/c               |
| Hall group             | -P 2ybc              | -P 2ybc              |
| Moiety formula         | C19 H17 B F2 I2 N2 O | C19 H17 B F2 I2 N2 O |
| Sum formula            | C19 H17 B F2 I2 N2 O | C19 H17 B F2 I2 N2 O |
| Mr                     | 591.96               | 591.96               |
| Dx, g cm <sup>-3</sup> | 2.019                | 2.019                |
| Z                      | 8                    | 8                    |
| Mu (mm <sup>-1</sup> ) | 3.260                | 3.260                |
| F000                   | 2256.0               | 2256.0               |
| F000'                  | 2249.34              |                      |
| h,k,lmax               | 28,13,23             | 28,13,23             |
| Nref                   | 8931                 | 8873                 |
| Tmin,Tmax              | 0.758,0.775          | 0.628,0.746          |
| Tmin'                  | 0.743                |                      |

Correction method= # Reported T Limits: Tmin=0.628 Tmax=0.746  
AbsCorr = MULTI-SCAN

Data completeness= 0.994                      Theta(max)= 27.480

R(reflections)= 0.0554( 6854)              wR2(reflections)= 0.1062( 8873)

S = 1.132                                      Npar= 503

---

The following ALERTS were generated. Each ALERT has the format  
**test-name\_ALERT\_alert-type\_alert-level**.  
Click on the hyperlinks for more details of the test.

---

**Alert level B**

PLAT213\_ALERT\_2\_B Atom C8B                      has ADP max/min Ratio .....              4.4 oblate

---

**Alert level C**

CRYSC01\_ALERT\_1\_C The word below has not been recognised as a standard  
identifier.

bordeaux

|                                                                    |                                        |              |
|--------------------------------------------------------------------|----------------------------------------|--------------|
| PLAT213_ALERT_2_C Atom C17B                                        | has ADP max/min Ratio .....            | 3.2 oblate   |
| PLAT245_ALERT_2_C U(iso) H10A                                      | Smaller than U(eq) O1A              by | 0.011 Ang**2 |
| PLAT342_ALERT_3_C Low Bond Precision on C-C Bonds .....            |                                        | 0.00895 Ang. |
| PLAT906_ALERT_3_C Large K Value in the Analysis of Variance .....  |                                        | 8.007 Check  |
| PLAT911_ALERT_3_C Missing FCF Refl Between Thmin & STh/L= 0.600    |                                        | 26 Report    |
| PLAT977_ALERT_2_C Check Negative Difference Density on H10A        |                                        | -0.33 eA-3   |
| PLAT977_ALERT_2_C Check Negative Difference Density on H11B        |                                        | -0.45 eA-3   |
| PLAT977_ALERT_2_C Check Negative Difference Density on H13D        |                                        | -0.32 eA-3   |
| PLAT977_ALERT_2_C Check Negative Difference Density on H16B        |                                        | -0.31 eA-3   |
| PLAT978_ALERT_2_C Number C-C Bonds with Positive Residual Density. |                                        | 0 Info       |

---

**Alert level G**

|                                                                    |             |
|--------------------------------------------------------------------|-------------|
| PLAT005_ALERT_5_G No Embedded Refinement Details Found in the CIF  | Please Do ! |
| PLAT083_ALERT_2_G SHELXL Second Parameter in WGHT Unusually Large  | 30.51 Why ? |
| PLAT432_ALERT_2_G Short Inter X...Y Contact F1A ..C6B              | 2.94 Ang.   |
| 1-x, -1/2+y, 3/2-z =                                               | 2_646 Check |
| PLAT720_ALERT_4_G Number of Unusual/Non-Standard Labels .....      | 2 Note      |
| PLAT899_ALERT_4_G SHELXL97 is Deprecated and Succeeded by SHELXL   | 2018 Note   |
| PLAT910_ALERT_3_G Missing # of FCF Reflection(s) Below Theta(Min). | 2 Note      |
| PLAT912_ALERT_4_G Missing # of FCF Reflections Above STh/L= 0.600  | 36 Note     |

- 
- 0 **ALERT level A** = Most likely a serious problem - resolve or explain  
1 **ALERT level B** = A potentially serious problem, consider carefully  
11 **ALERT level C** = Check. Ensure it is not caused by an omission or oversight  
7 **ALERT level G** = General information/check it is not something unexpected

- 1 ALERT type 1 CIF construction/syntax error, inconsistent or missing data  
10 ALERT type 2 Indicator that the structure model may be wrong or deficient  
4 ALERT type 3 Indicator that the structure quality may be low  
3 ALERT type 4 Improvement, methodology, query or suggestion  
1 ALERT type 5 Informative message, check
-

# checkCIF publication errors

---

## ● Alert level G

PUBL017\_ALERT\_1\_G The \_publ\_section\_references section is missing or empty.

---

0 **ALERT level A** = Data missing that is essential or data in wrong format

1 **ALERT level G** = General alerts. Data that may be required is missing

---

## Publication of your CIF

You should attempt to resolve as many as possible of the alerts in all categories. Often the minor alerts point to easily fixed oversights, errors and omissions in your CIF or refinement strategy, so attention to these fine details can be worthwhile. In order to resolve some of the more serious problems it may be necessary to carry out additional measurements or structure refinements. However, the nature of your study may justify the reported deviations from journal submission requirements and the more serious of these should be commented upon in the discussion or experimental section of a paper or in the "special\_details" fields of the CIF. *checkCIF* was carefully designed to identify outliers and unusual parameters, but every test has its limitations and alerts that are not important in a particular case may appear. Conversely, the absence of alerts does not guarantee there are no aspects of the results needing attention. It is up to the individual to critically assess their own results and, if necessary, seek expert advice.

If you wish to submit your CIF for publication in Acta Crystallographica Section C or E, you should upload your CIF via the web. If you wish to submit your CIF for publication in IUCrData you should upload your CIF via the web. If your CIF is to form part of a submission to another IUCr journal, you will be asked, either during electronic submission or by the Co-editor handling your paper, to upload your CIF via our web site.

---

**PLATON version of 13/12/2018; check.def file version of 11/12/2018**

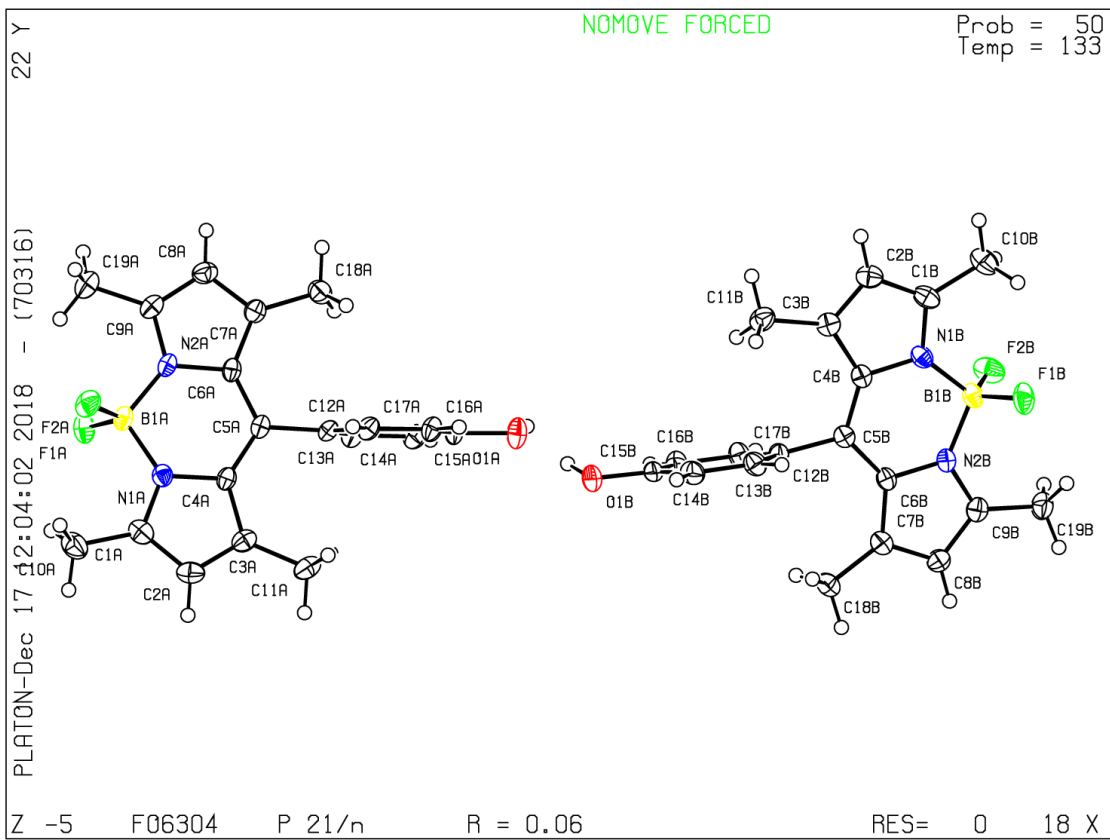

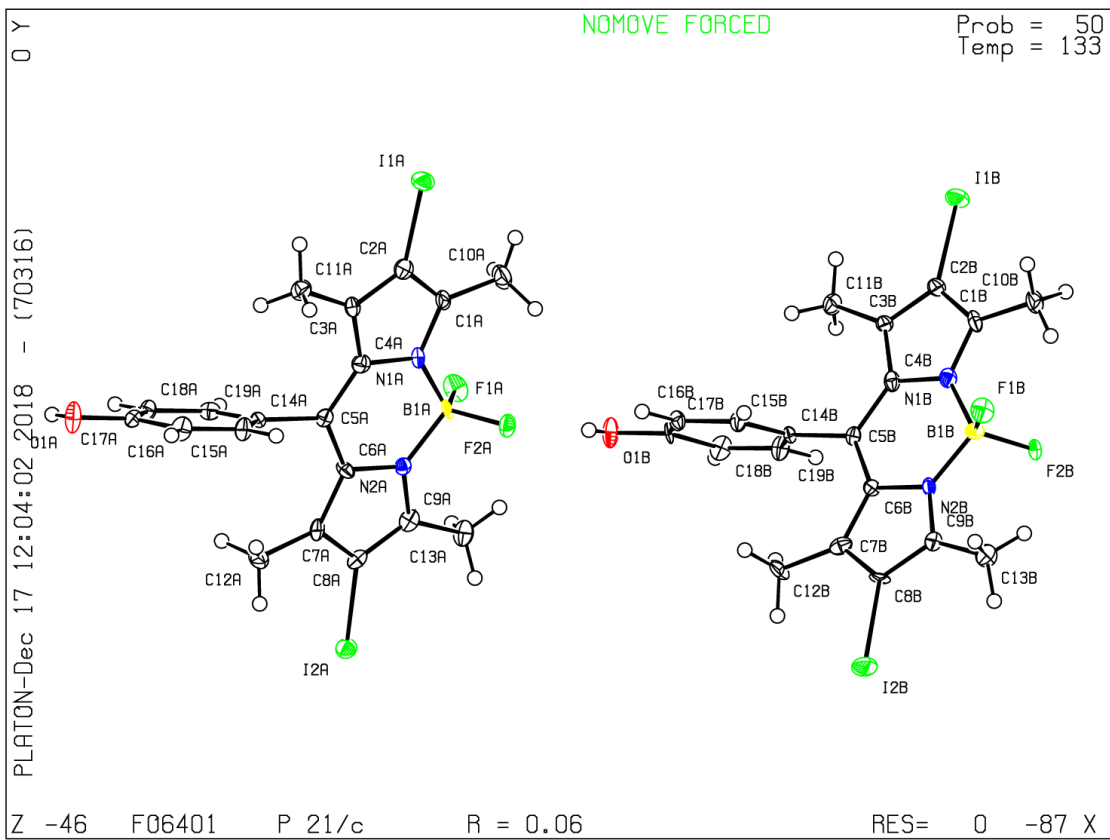

Supplement: d0cp00232a1.pdf [file d0cp00232a1.pdf]
